# Supplementary material for: Genetically stable poliovirus vectors activate dendritic cells and prime antitumor CD8 T cell immunity
Source: PubMed Central journal article supplement (PMC6985231; doi:10.1038/s41467-019-13939-z), 2020-01-27
Supplement: 41467_2019_13939_MOESM1_ESM.pdf [file 41467_2019_13939_MOESM1_ESM.pdf]

## **Supplementary Information**

### Genetically Stable Poliovirus Vectors Activate Dendritic Cells and Prime Antitumor CD8 T Cell Immunity

Mosaheb et al.

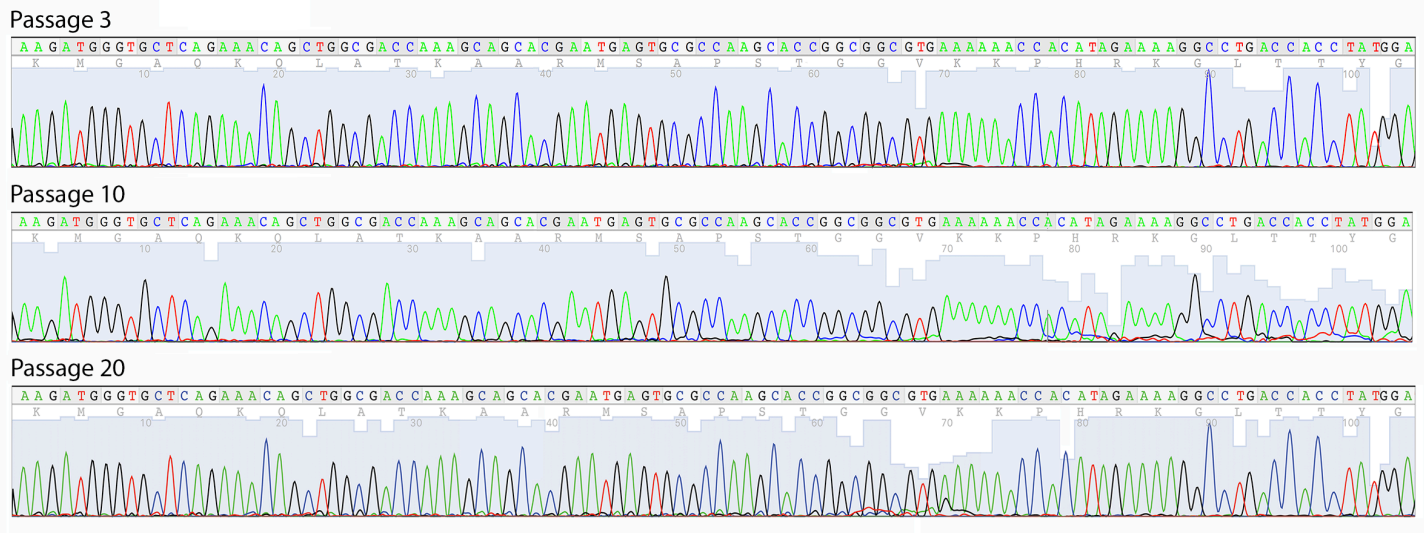

**Supplementary Figure 1 (related to Fig. 1g). Sequence chromatogram of RIPO(H3.3) serial passaging.**

Sequence chromatograms of RIPO(H3.3) genomic sequences encompassing the entire foreign insert (see **Figure 1g**) obtained from total RNA isolated from infected HeLa cells after 3, 10, or 20 passages. The foreign insert remained unchanged throughout 20 passages.

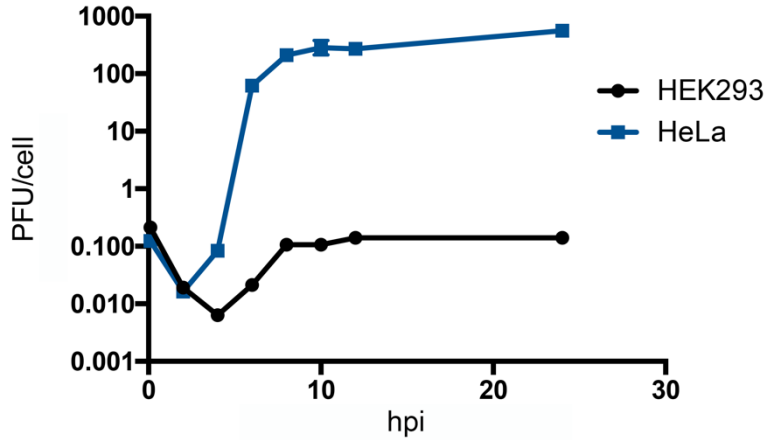

**Supplementary Figure 2 (related to Fig. 1h). One-step growth curves of RIPO(H3.3) in HEK293 cells compared to HeLa cells.**

The assay was performed as described previously for the PVSRIPO parent.<sup>1</sup> The one-step growth curve of RIPO(H3.3) in HeLa cells is identical to the data shown in **Figure 1h**. RIPO(H3.3) is replication-deficient in HEK293 cells, indicating that it retains the neuron-incompetent phenotype of the HRV2 IRES.<sup>1</sup>

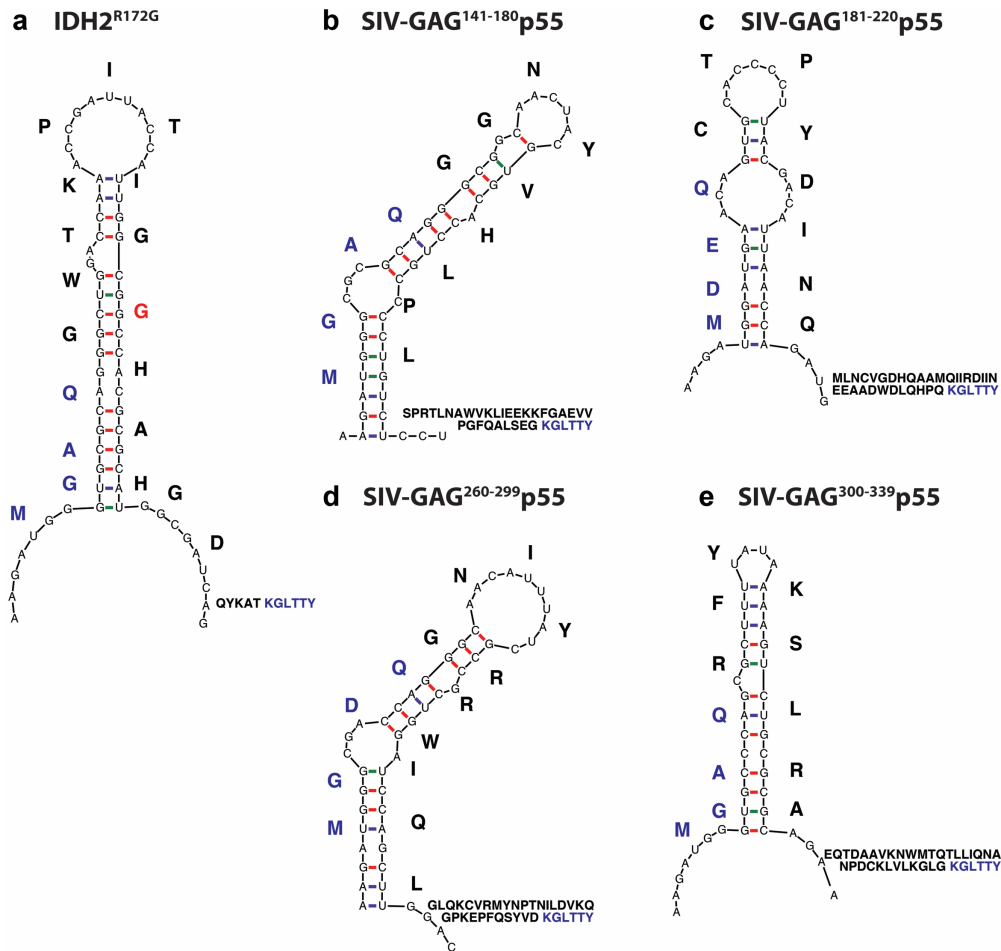

**Supplementary Figure 3 (related to Fig. 1). Additional vector designs with confirmed genetic stability.**

Vectors delivering a peptide containing the isocitrate dehydrogenase 2 R172G (IDH2<sup>R172G</sup>) mutation of malignant gliomas (a), or peptides corresponding to various segments of the simian immunodeficiency (SIV) p55 Gag antigen (b-e) were derived and confirmed genetically stable according to the criteria laid out in **Figure 1** and related text. The constructs were derived with primers listed in **Supplementary Table 1**.

**A** mOVA1

M G A Q V S G L E Q L E S I I N F E K L ...

mOVA2

M G A Q V S G M E Q L E S I I N F E K L ...

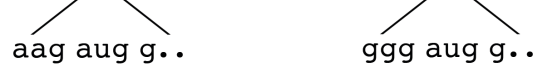

**B** 1st AUG in poor context

M G A Q V S G M E ...

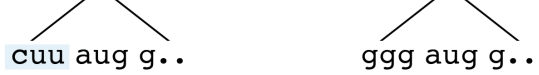

viable

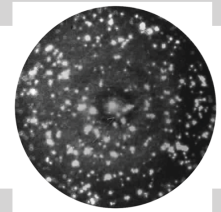

**C** frameshift - 1st AUG out of / 2nd AUG in virus frame

M G ...

...

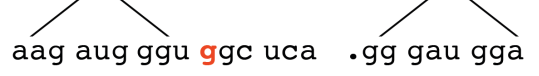

pseudoinfectious

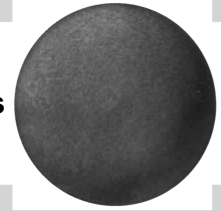

passage 3 revertant

M G G Q ... G M E ...

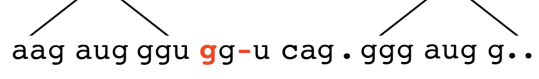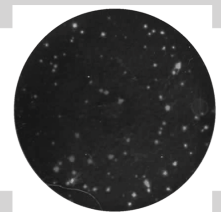

**D** 1st AUG in poor context + frameshift

M G ...

...

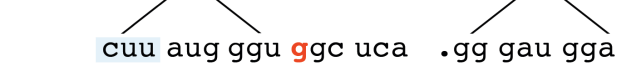

viable

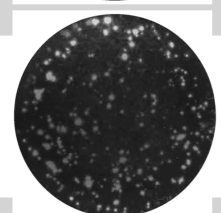

passage 17 revertant

M A Q V S G M E .....

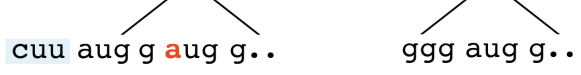

**Supplementary Figure 4 (related to Figs. 1, 2). Initiation codon usage with 'IRES SLD VI replacement vectors' – preference for the 1<sup>st</sup> AUG in optimal KOZAK context.**

(a) The C609A mOVA2 adaptation yields two tandem AUGs in optimal KOZAK context (G/A . . . AUG G). (b) To investigate initiation codon usage in mOVA2, we first placed the upstream AUG in poor (native HRV2) KOZAK context. This yielded viable virus. We assume that, since the cryptic AUG at nt 588 in the HRV2 IRES sequence is not used for initiation, the new downstream AUG in mOVA2 can be used for initiation. (c) A frameshift introduced between the 2 AUGs (inserted nt is shown in red) yields a pseudoinfectious construct that gains viability upon restoring the vector ORF from the upstream AUG at nt 588. This suggested that, when the upstream AUG is in ideal KOZAK context, it is always used for initiation. (d) Placing the upstream AUG at nt 588 in poor KOZAK context combined with the same frameshift instituted in (c) yields a viable vector. However, a revertant emerges, where the upstream AUG is in improved KOZAK context and where the vector ORF from the upstream AUG is restored. This, again, suggests that the conserved AUG at nt 588 is preferred for initiation, if in optimal KOZAK context. Examples for plaque phenotypes of the respective constructs (or their adapted variants) are shown in the right-hand column.

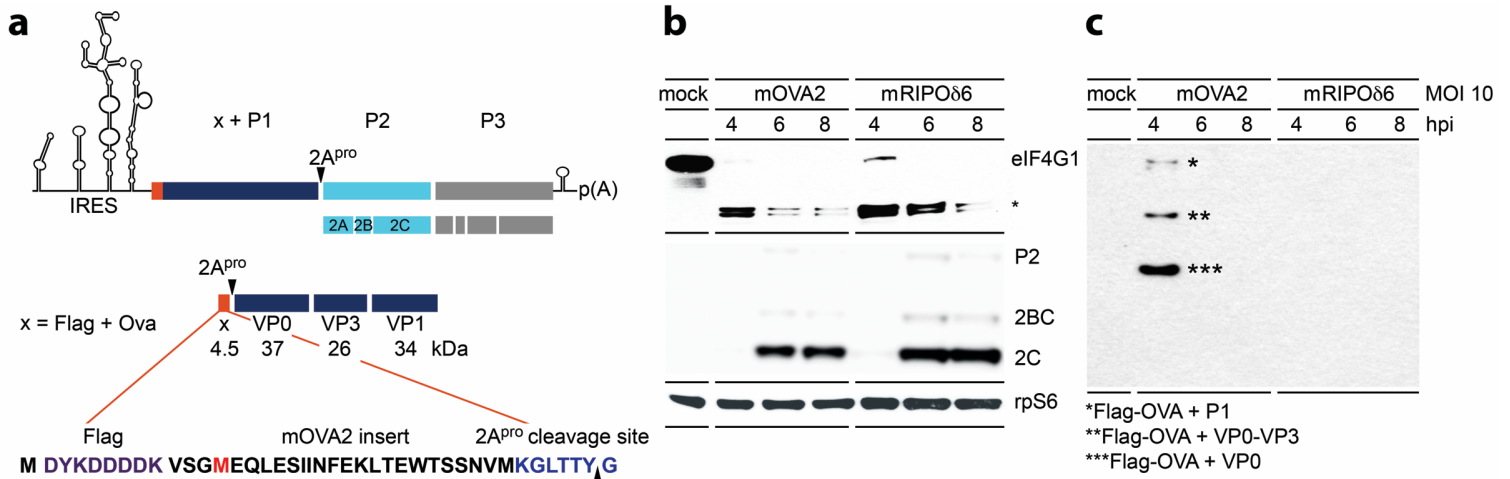

**Supplementary Figure 5 (related to Fig. 2). Expression of the SIINFEKL epitope in mOVA2-infected HeLa cells.**

(a) Since there are no suitable antibodies for detecting the SIINFEKL epitope in immunoblot, we generated a variant of mOVA2 expressing a flag-OVA fusion polypeptide. Processing map of the mOVA2 polyprotein and its P1 (capsid protein-encoding) portion; the flag-OVA antigen is highlighted in red. (b, c) Immunoblots showing eIF4G1 cleavage and viral translation (b) and flag-OVA immunoprecipitation (c) after infection of HeLa cells with mOVA2 or mRIPO $\delta$ 6. Flag-OVA epitope fusion polypeptides corresponding to Flag-OVA + P1, Flag-OVA + VP0-VP3 and Flag-OVA + VP0 were detected at 4hpi. Lacking detection at intervals thereafter is likely due to rapid proteolytic processing of the fusion polypeptides.

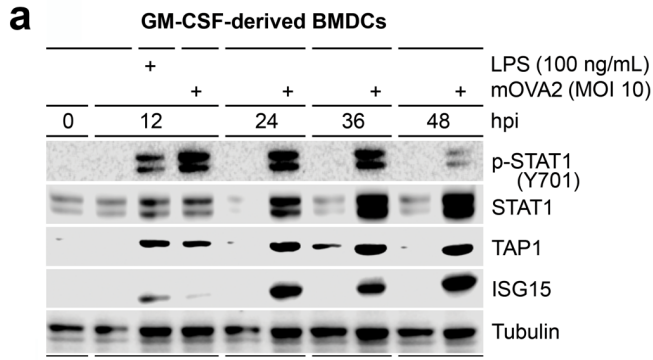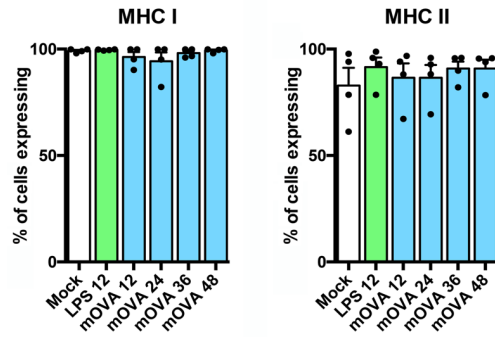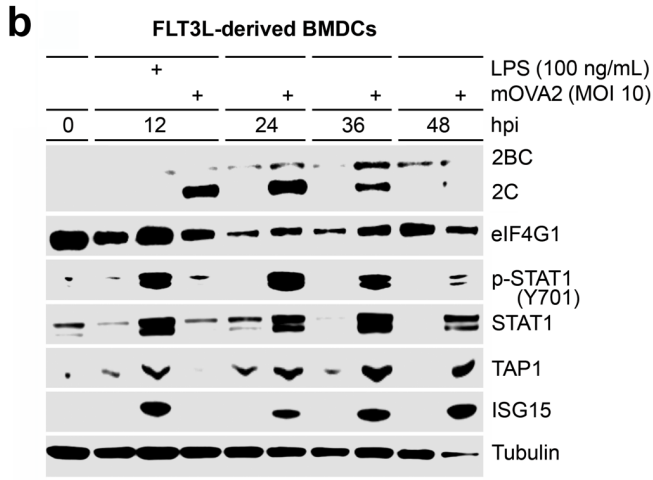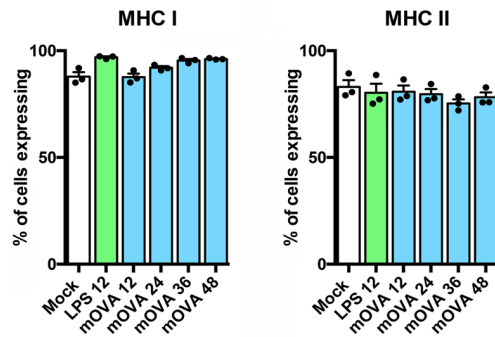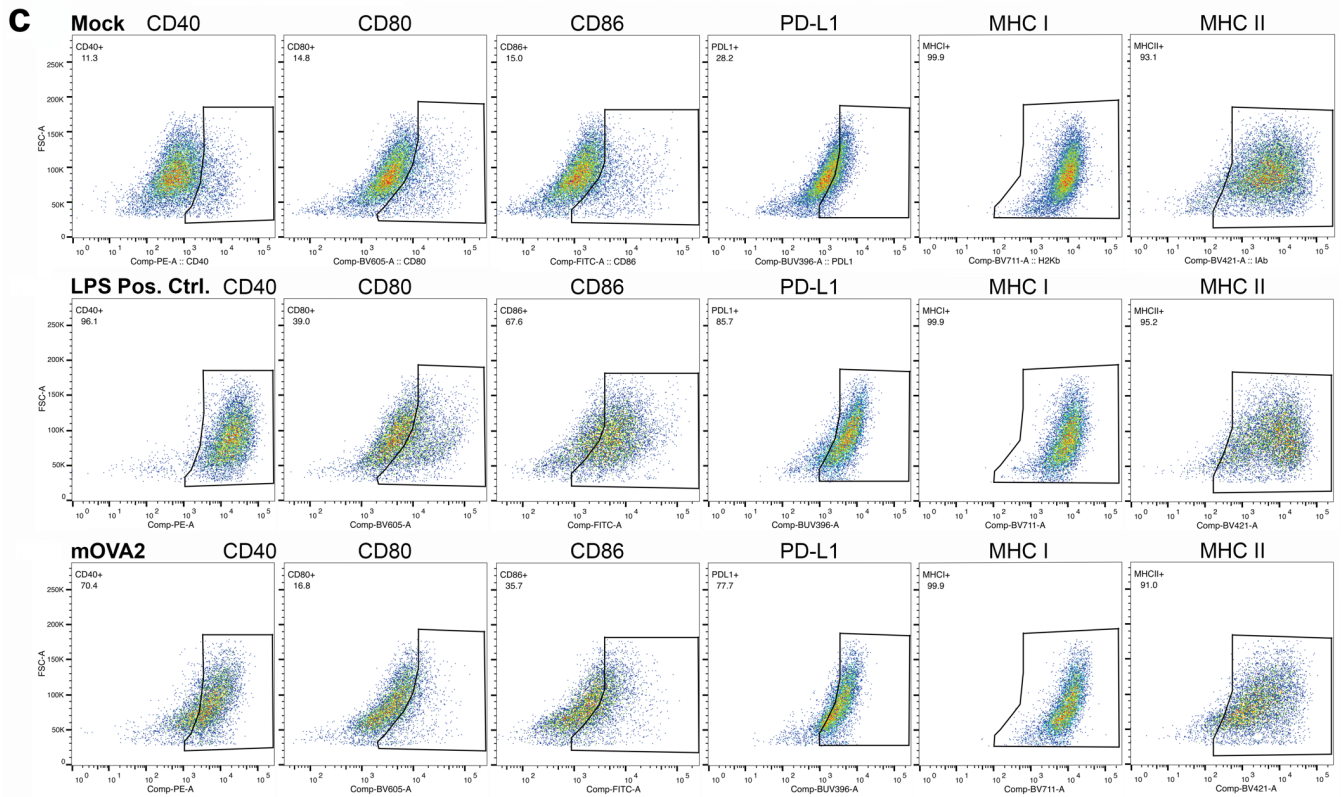



**Supplementary Figure 6 (related to Fig. 3a, b). Immunoblot and flow cytometry analyses of BMDC phenotypes.**

**(a, b)** (Left panels) Independent, repeat set of immunoblot assays for infected GMCSF- (**Fig. 3a**) and FLT3L-BMDCs (**Fig. 3b**). (Right panels) Surface MHC I/II expression for GMCSF- and FLT3L-BMDCs upon infection with mOVA2 or treatment with LPS. **(c)** Gating strategy for CD40, CD80, CD86, PDL1 and MHC I/II positive BMDCs (Gated on CD11c<sup>+</sup>) in **Figure 3a, b**.

**a** GM-CSF-derived BMDCs

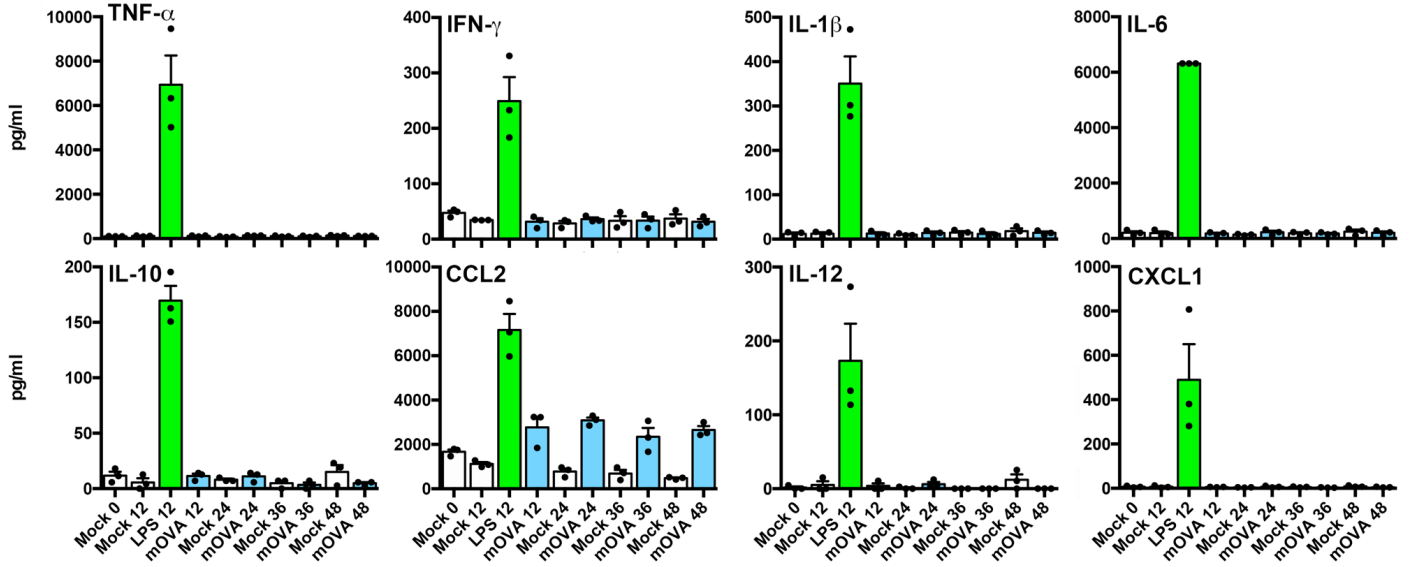

**b** FLT3L-derived BMDCs

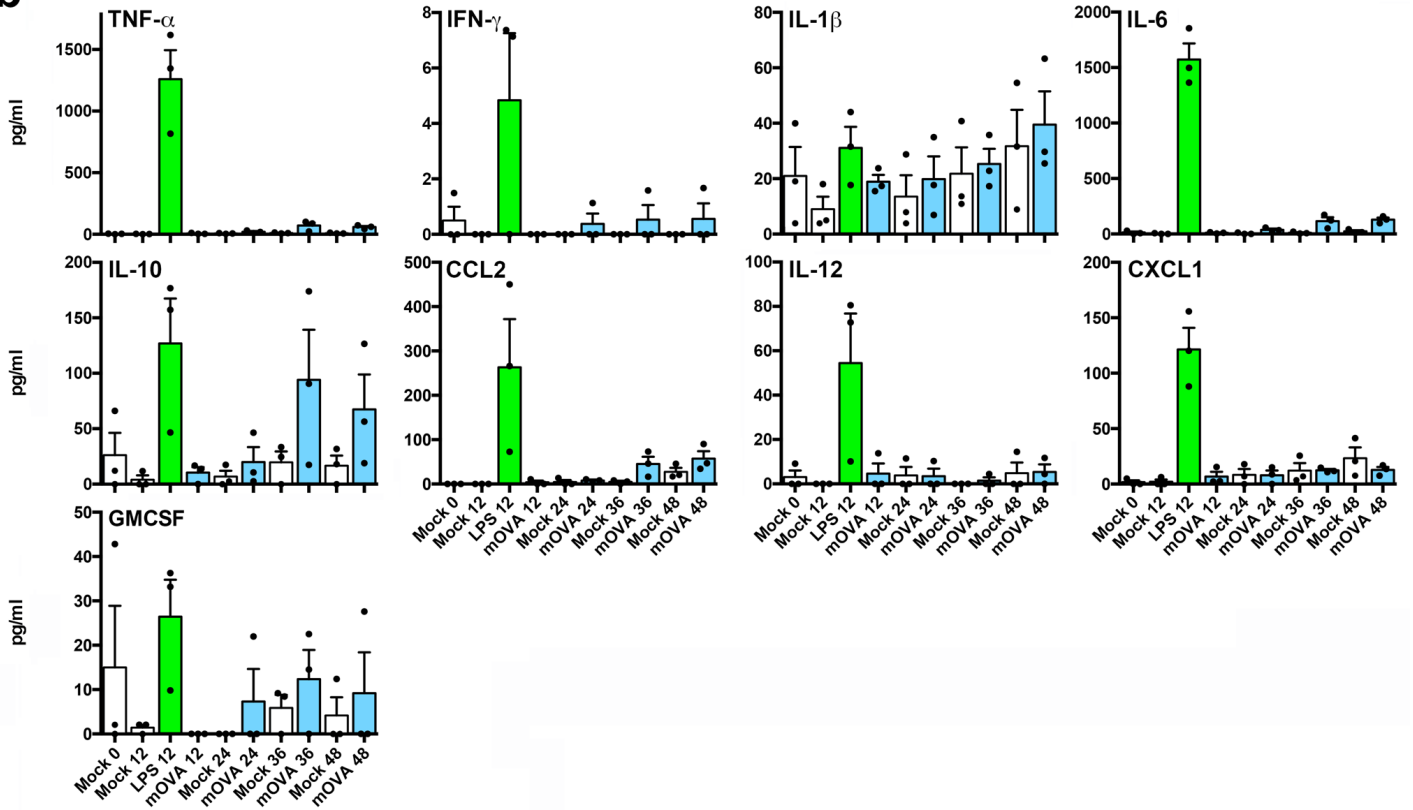

**Supplementary Figure 7 (related to Fig. 3c, d). Cytokine analyses of infected BMDCs.**

(a, b) Cytokine bead array results for the set of cytokines not shown in **Figure 3** in tests of GMCSF- (a) or FLT3L- (b) BMDCs upon infection with mOVA2 or treatment with LPS (see **Fig. 3c, d** for IFN $\alpha$ , IFN $\beta$ , CCL5 and CXCL10). GMCSF is not shown for (a) because the medium was supplemented with GMCSF.

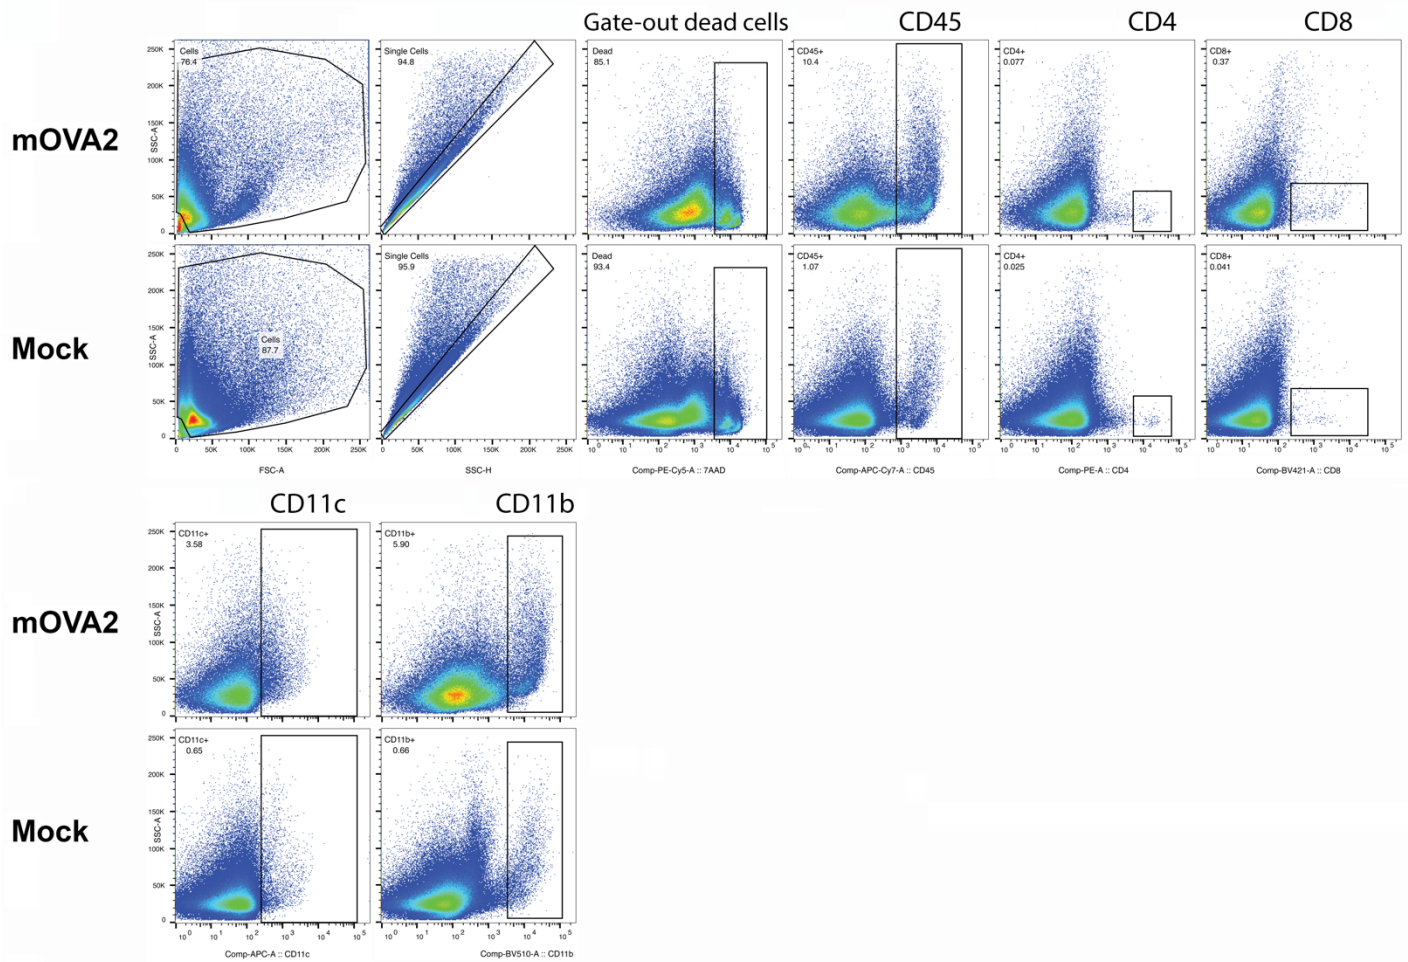

**Supplementary Figure 8 (related to Fig. 4b). Gating strategy for analyses of skeletal muscle immune cell infiltrates in immunized hCD155-tg mice.**

Gating strategy for skeletal muscle immune cell infiltrates (CD45, CD4, CD8, CD11c and CD11b) after mOVA2 or mock (DMEM) immunization in **Figure 4b**.

**Gated on Live CD45<sup>+</sup> Cells**

**Gated on Live CD45<sup>+</sup>MHCII<sup>+</sup>CD11c<sup>+</sup> Cells**

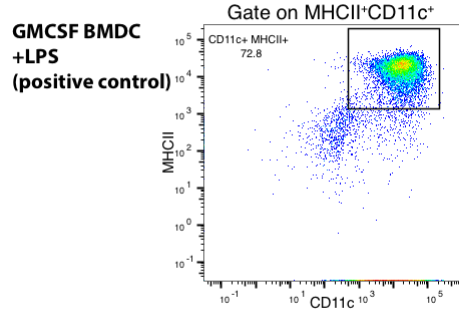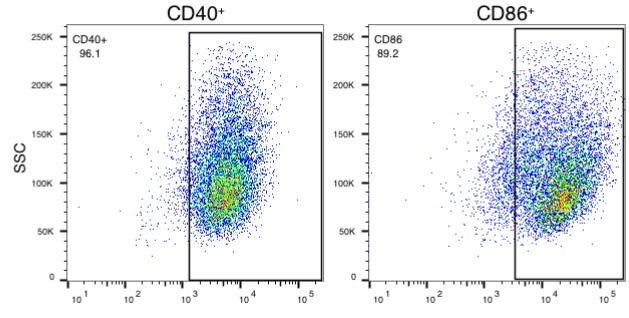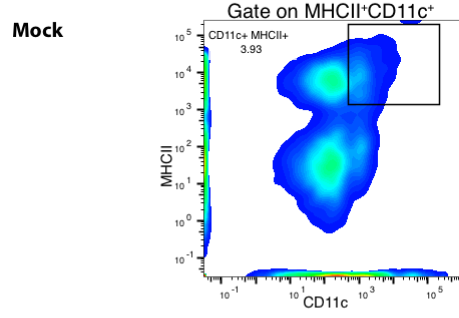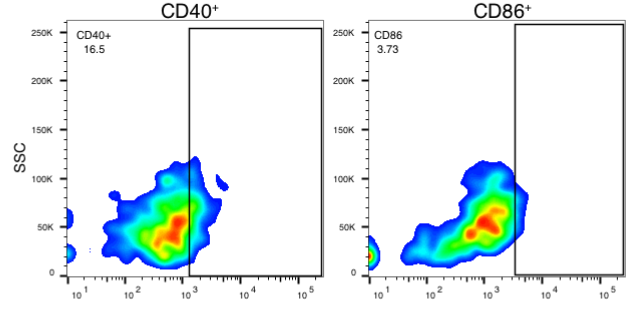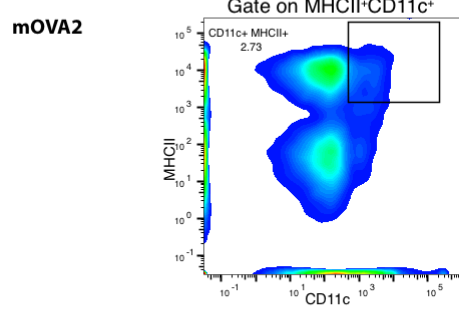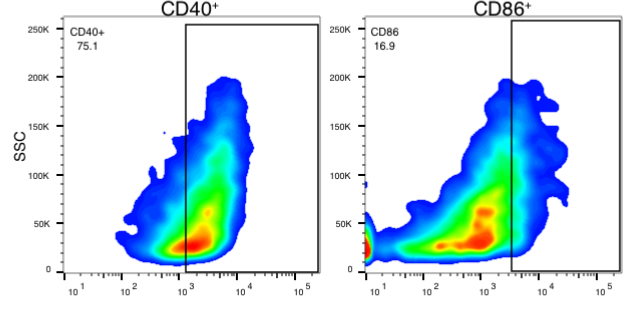

**mOVA2 (Isotype control)**

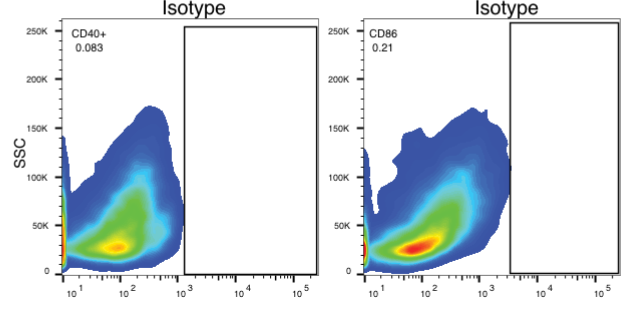

**Supplementary Figure 9 (related to Fig. 4c). Representative flow cytometry data and gating strategy for analyses of skeletal muscle immune cell infiltrates in immunized hCD155-tg mice.**

Gating analysis for CD40 and CD86 positive skeletal muscle-infiltrating DCs (CD11c<sup>+</sup>MHCII<sup>+</sup>) in

**Figure 4c.**

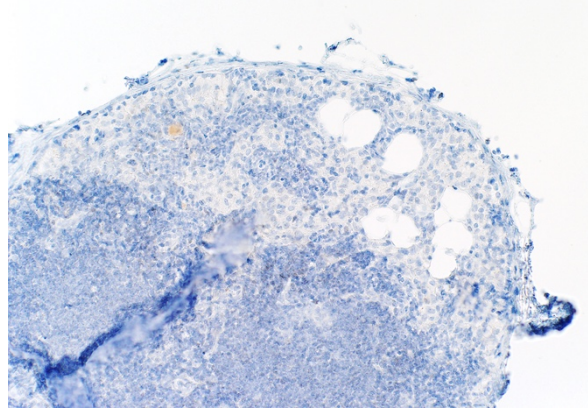

**Supplementary Figure 10 (related to Fig. 4d). Immunohistochemical staining for H3.3<sup>K27M</sup> in a popliteal lymph node of a mock-immunized hCD155-tg mouse.**

The assay was conducted as described for **Figure 4d**.

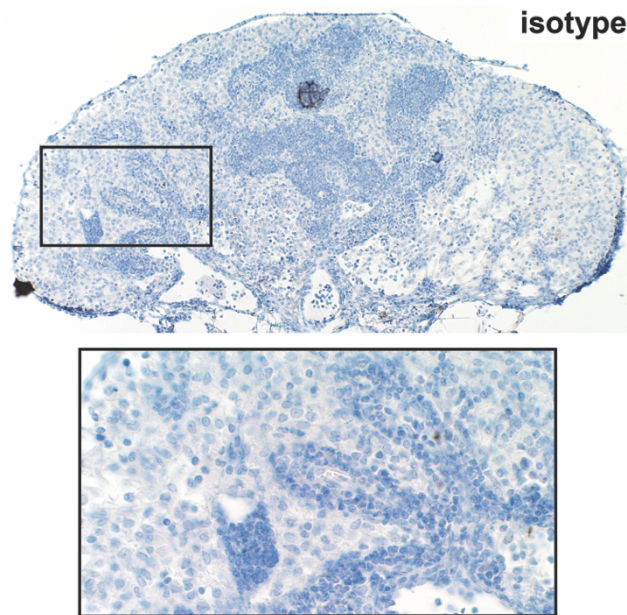

**Supplementary Figure 11 (related to Fig. 4d). Immunohistochemical staining with an isotype-matched, non-specific control of a lymph node section consecutive to those shown in Figure 4d.**

The assay was conducted as described for **Figure 4d**.

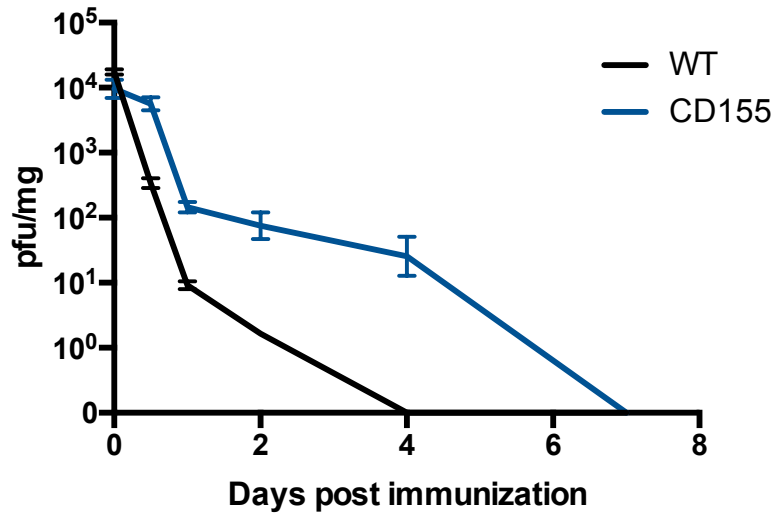

**Supplementary Figure 12 (related to Fig. 4). Intramuscular replication of mRIPO(H3.3) in hCD155-tg mice.**

Recovery of infectious mRIPO(H3.3) in skeletal muscle tissue, after intramuscular inoculation (10<sup>7</sup> pfu) in wild type or hCD155-tg mice, was assessed over time using previously reported procedures for an identical assay.<sup>2</sup>



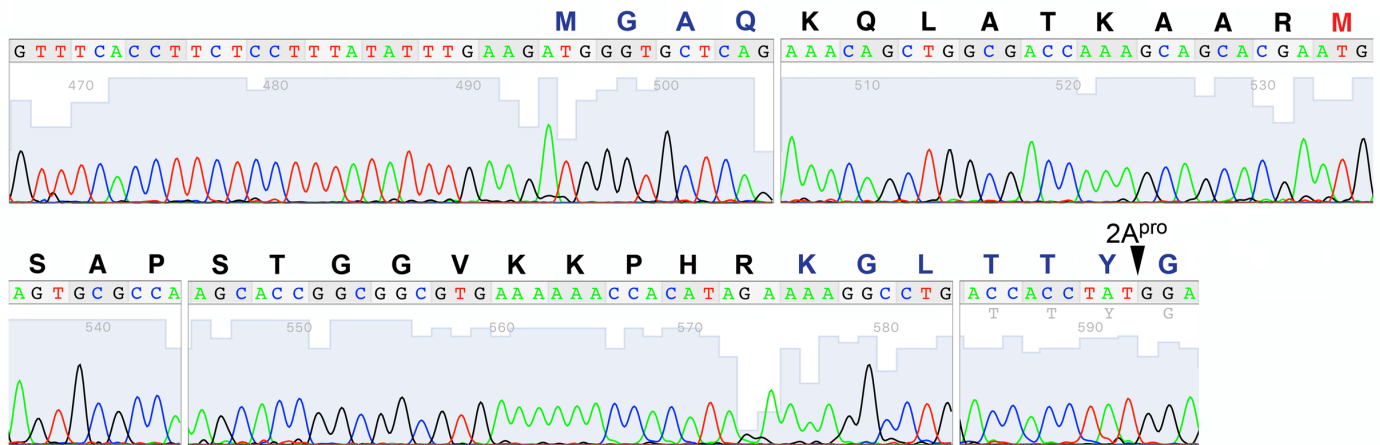

**Supplementary Figure 13 (related to Fig. 4). Genetic stability of mRIPO(H3.3) after intramuscular replication in hCD155-tg mice.**

Chromatogram of sequences obtained from mRIPO(H3.3) recovered from skeletal muscle of hCD155-tg mice 4 days after intramuscular inoculation ( $10^7$  pfu). The region encompassing the engineered initiation codon, the coding region for the H3.3<sup>K27M</sup> epitope and the engineered 2A<sup>pro</sup> cleavage site are indicated. Compare to the original vector design (Fig. 1g) and to sequence chromatograms after serial passage in HeLa cells (Supplementary Fig. 1).

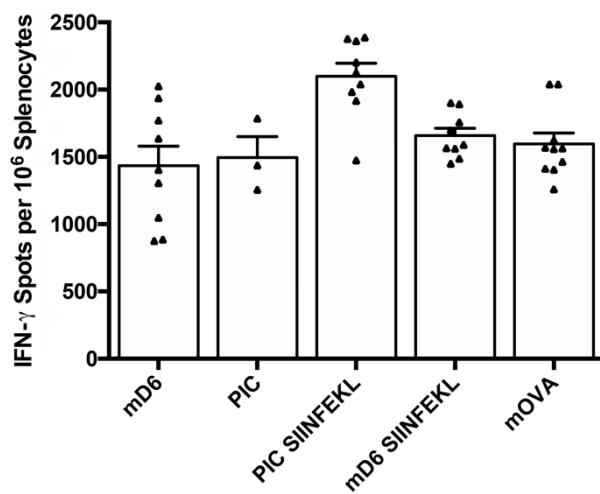

**Supplementary Figure 14 (related to Fig. 5a, b). Positive control for IFN- $\gamma$  ELISPOT assay.**

Splenocytes from **Figure 5a, b** were treated with Concanavalin A as a positive control for IFN- $\gamma$  ELISPOT assay. See details for the assay in **Figure 5a, b** and related text.

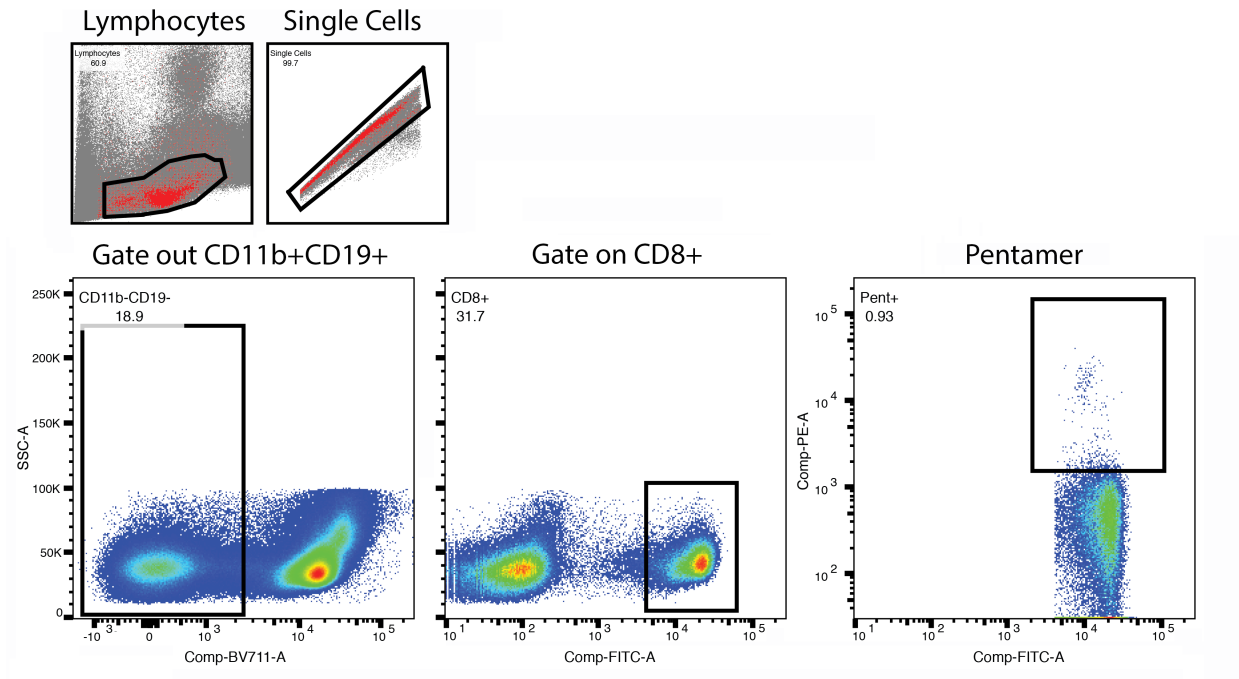

**Supplementary Figure 15 (related to Fig. 5c, d). Gating strategy for H2Kb-SIINFEKL pentamer and HLA-A2-RMSAPSTGGV tetramer staining of peripheral CD8 T cells.**

Representative sample shown is H2Kb-SIINFEKL pentamer staining of an mOVA2-immunized mouse.

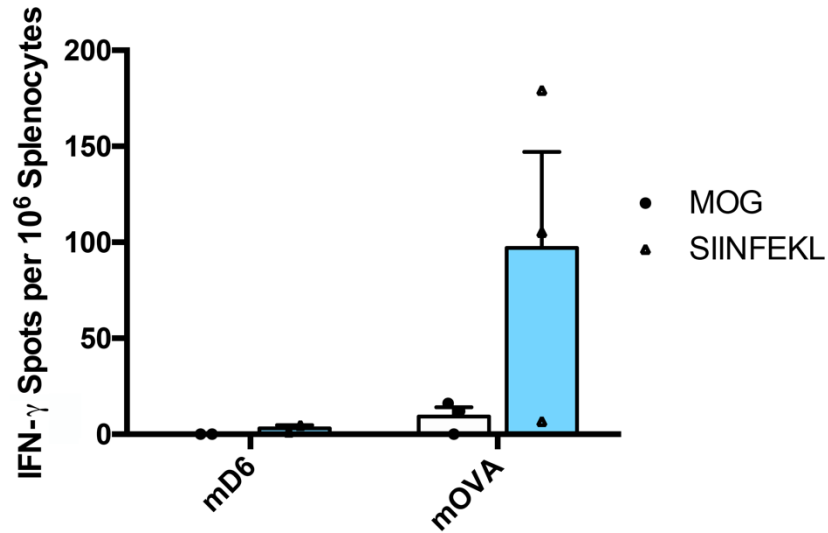

**Supplementary Figure 16 (related to Fig. 5c, d). Immunization with mOVA2-infected DCs induces SIINFEKL-specific CD8 T cell responses.**

FLT3L-BMDCs were generated from hCD155-tg mice, as described for **Figure 3**. The cells were infected with mRIP0 $\delta$ 6 or mOVA2 (MOI 10) (2h). The infected BMDCs were washed in PBS three times and inoculated intraperitoneally into wild type C57Bl6 mice (not expressing hCD155 and, thus, unable to sustain poliovirus replication in any compartment). An identical booster dose was administered 2 weeks after prime and an IFN- $\gamma$  ELISPOT assay was performed seven days later.

## a Gating Strategy for CD45+CD3+ cells

### mOVA2 Immunized

Gate on Cells, Single Cells and Live Cells

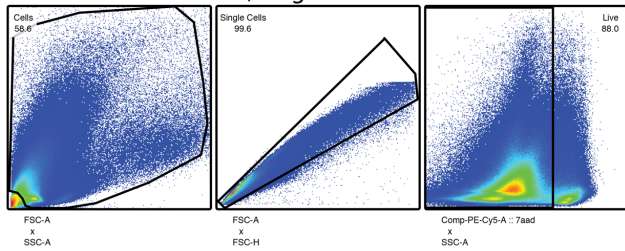

Gate on CD45+ Cells

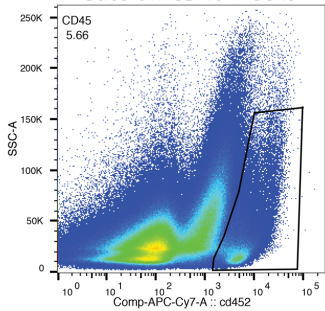

Gate on CD3+ Cells

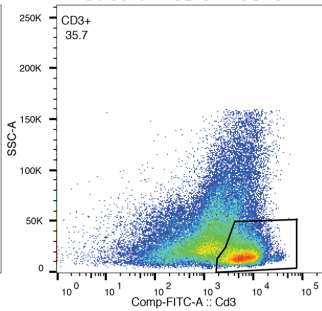

### mRIPOδ6 Immunized

Gate on Cells, Single Cells and Live Cells

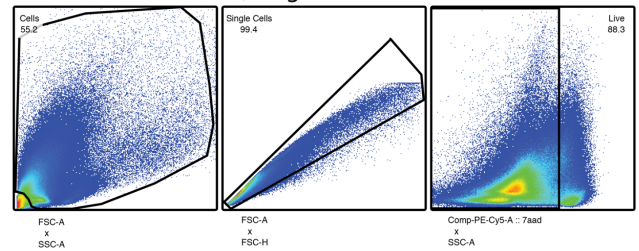

Gate on CD45+ Cells

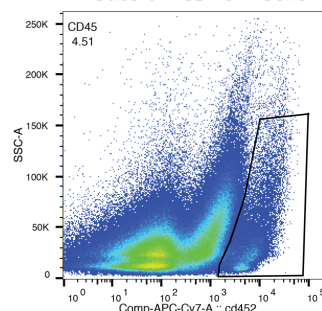

Gate on CD3+ Cells

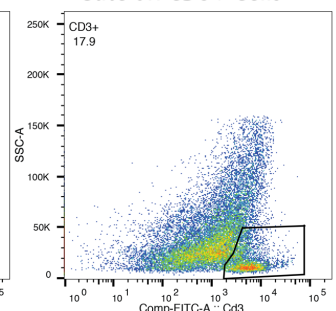

## b Gating Strategy for CD8+ and CD4+ cells

### mOVA2 Immunized

Gate on Lymphocyte, Single Cells and Live

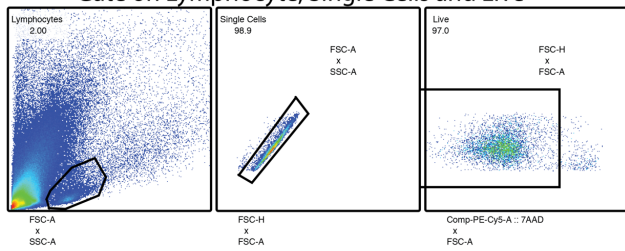

Gate on CD3+ Cells

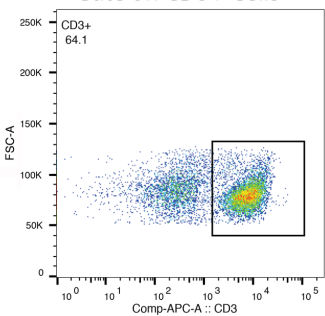

CD4+ and CD8+ Gating

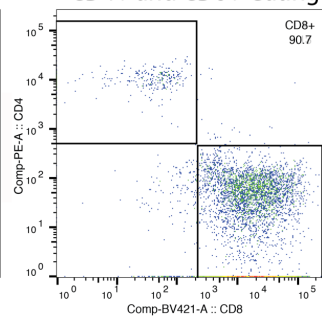

### mRIPOδ6 Immunized

Gate on Lymphocyte, Single Cells and Live

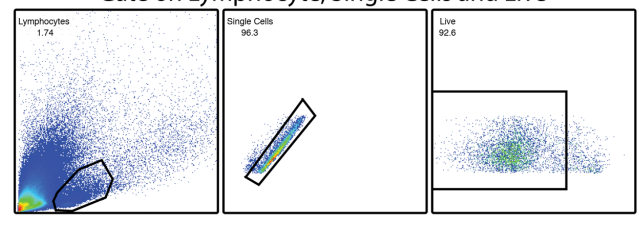

Gate on CD3+ Cells

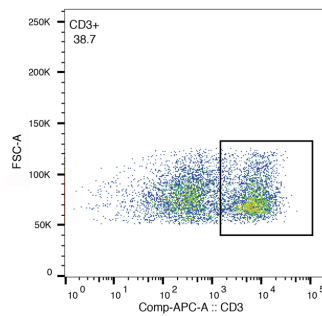

CD4+ and CD8+ Gating

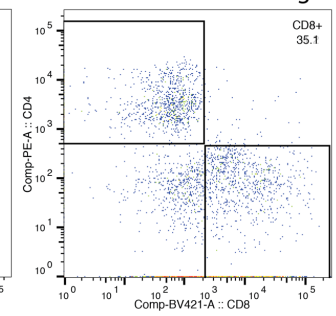

**Supplementary Figure 17 (related to Fig 6c). Representative flow cytometry data and gating strategy for tumor-infiltrating lymphocytes.**

(a) Gating strategy for testing tumor-infiltrating CD45+ and CD3+ cells. (b) Gating strategy for assessing the CD8+:CD4+ ratio.

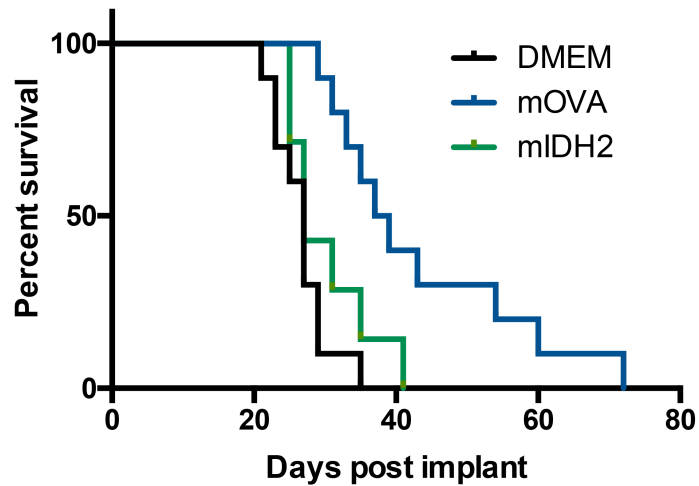

**Supplementary Figure 18 (related to Fig 6).**

Results of a replicate assay of mOVA2 immunization of hCD155-tg mice bearing B16-OVA tumor implants. Experimental groups include mOVA2 immunized- (n=10), mIDH2 immunized- (see **Supplementary Figure 3a**) (n=7), and mock (DMEM)-immunized animals (n=10). Mice were immunized on day 0, boosted on day 14, and tumors were implanted on day 21.

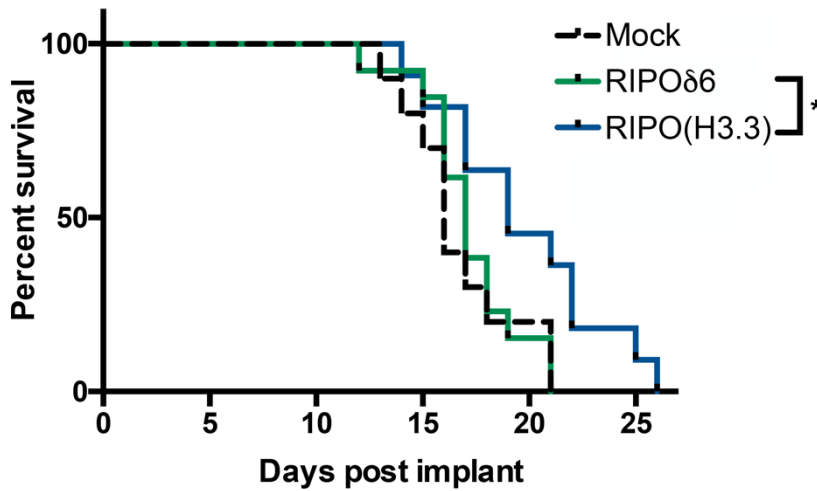

**Supplementary Figure 19 (related to Fig 7).**

Results of a replicate assay showing that mRIPO(H3.3) immunization extends survival in an immunocompetent, intracerebral malignant glioma model. The assay was conducted as described for Figure 7e. mRIPO(H3.3)-immunized mice survived significantly longer than mRIPOδ6-immunized animals [P=0.0414, Log-rank (Mantel-Cox) test, median survival; mRIPOδ6 n=13, mRIPO(H3.3) n=11]; Mock group (n=10) included for visual illustration only. Data from two independent experiments combined.





**Supplementary Figure 20 (related to Fig. 8a and c). Immunoblot, flow cytometry analyses, and gating strategy of infected human DC phenotypes.**

(a) Repeat immunoblot assay of human GM-CSF-derived DCs after infection with RIPO(H3.3) (compare to **Fig. 7a**). (b) Surface MHC I expression on infected DCs. (c) Gating strategy for DC phenotype in **Figure 7c**. Mature DCs, DCs treated with maturation cocktail as previously described<sup>3,4</sup> are included as positive control.

### GM-CSF-derived DCs

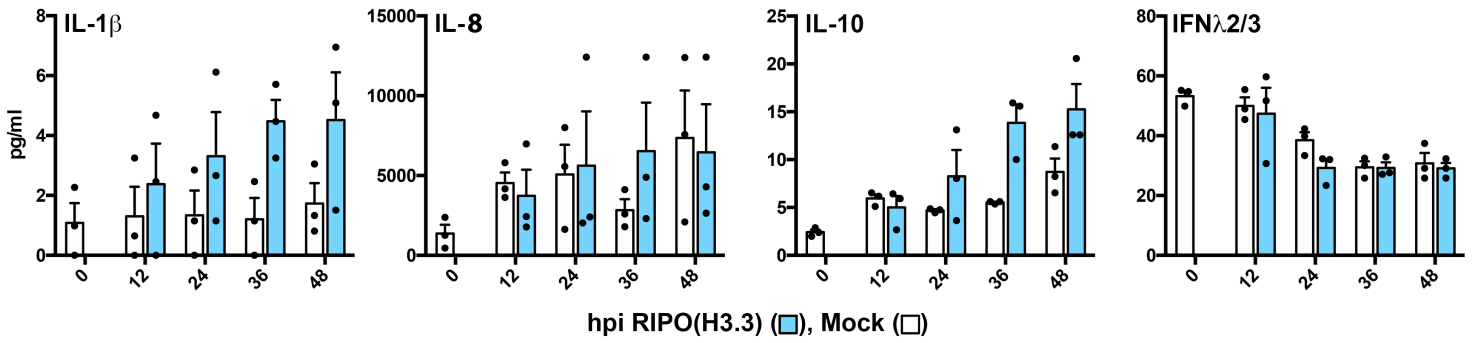

### Supplementary Figure 21 (related to Fig. 8d). Cytokine analyses of infected human DCs.

Cytokine bead array results for the set of cytokines not shown in **Figure 7d** (tests from RIPO(H3.3)-infected human DCs at 0, 12, 24, 36 and 48 hours post infection, hpi).

**Supplementary Table S1. Primers used in this study.**

| <b>Primer<sup>a</sup></b> | <b>Sequence (5' to 3')</b>                                                                                               |
|---------------------------|--------------------------------------------------------------------------------------------------------------------------|
| mOVA1-5'                  | cctttatattgaagatgggggctcaggtcagtgaggctggagcaactggagagcatcatcaacttgagaaactgact<br>gaatgg                                  |
| mOVA1-3'                  | ctgagctccataggtggctcagacccttcatcacgttactactagtcattcagtcagtttctcaaagttg                                                   |
| mOVA2-5'                  | cctttatattgaagatgggggctcaggtcagtgaggatggagcaactggagagcatcatcaacttgagaaactgact<br>gaatgg                                  |
| mOVA2-PC-5'               | cctttatattgcttattgggtgctcaggtcagtgaggatggagc                                                                             |
| mOVA2-PC-3'               | ccataagcaaatataaaggagaa                                                                                                  |
| mOVA-flag-5'              | cctttatattgaagatgggtggctcaggtcagtgaggatggagc                                                                             |
| mOVA2-FS-5'               | cctttatattgaagatggattacaaggatgacgacgataaggtcagtgaggatggagcca                                                             |
| RIPO(H3.3)-5'             | cctttatattgaagatgggtgctcagaacagctggcgaccaaagcagcacgaatgagtgc                                                             |
| RIPO(H3.3)-3'             | ctgagctccataggtggctcaggcctttctatgtggtttttcacgcccggtgcttggcgactcattcg                                                     |
| hIRES-5'                  | aggaattcaacttagaagttttcaca                                                                                               |
| hIRES-3'                  | gcacctcttcaaataaaggagaaggtgaaacacg                                                                                       |
| mIRES-5'                  | cccacgtggcggctagtactcc                                                                                                   |
| mIRES-3'                  | cccatctcaaataaaggagaaggtgaaacacg                                                                                         |
| Seq-3'                    | aatggtagaaccaccatacgc                                                                                                    |
| IDH2(R172G)-5'            | cctttatattgaagatgggtgctcagggctggaccaaaccgattaccattggcggccacgcgcatggc                                                     |
| IDH2(R172G)-3'            | ctgagctccataggtggctcaggcctttggtcgctttatactgatcgccatgcgctg                                                                |
| SIV139.1-5'               | ctttatattgaagatggcgcgaggcgcaactacgtgcacctgccctgtctcctagaactgaacgcatgg<br>gtg                                             |
| SIV139.1-3'               | ctgagctccataggtggctcagtccttgccttcagagcttgaatccaggcaccacttcagcccaaattttttc<br>ttcaattaattcaccatgcgttcagtg                 |
| SIV139.2-5'               | cttttattgaagatggatgaacagtgacccttacgacattaaccagatgctaaactgcgtggcgaccatcaggc<br>tgctatgcaaac                               |
| SIV139.2-3'               | ctgagctccataggtggctcagtcctccataggtggctcaggcctttctgaggatgctgcagatcccaatcagcggcttct<br>cgtaataatatcttaattgattgcatagcagcctg |
| SIV259.1-5'               | ctttatattgaagatggcgaccagggaacatttatcgccgctggatccagcttgacttcagaagtgcgtgcgca<br>tgtataacccaccaacatcctgg                    |
| SIV259.1-3'               | ctgagctccataggtggctcagtcctccataggtggctcaggcctttatccatagctctgaaagggttctttggccct<br>gtttcatcaccagatgttgggtggg              |
| SIV259.2-5'               | ctttatattgaagatgggtgccagcgtttataaaagtctgcgcgagaacagactgatgctgctgtgaaaaact<br>ggatgaccagacctgctgattcagaacgcaaccc          |
| SIV259.2-3'               | ctgagctccataggtggctcagtcctccataggtggctcaggcctttgccaggcctttcagcaccagtttgaatcaggg<br>ttggcgttctgaatcagc                    |

<sup>a</sup>Primer nomenclature (see Materials and Methods for primer use in vector cloning and sequencing).

**Supplementary Table S2***Immunoblot antibodies*

| <b>Antibody</b>      | <b>Company</b>              | <b>Item Number (dilution)</b>    |
|----------------------|-----------------------------|----------------------------------|
| eIF4G1               | Cell Signaling Technologies | 2469 (1:1,000)                   |
| STAT1                | Cell Signaling Technologies | 9172 (1:1,000)                   |
| STAT1P (Y701)        | Cell Signaling Technologies | 9167 (1:1,000)                   |
| TAP1                 | Cell Signaling Technologies | 12341 (1:1,000)                  |
| ISG 15               | Cell Signaling Technologies | 2743, 2758 (1:1,000)             |
| Tubulin              | Sigma-Aldrich               | T9026 (1:10,000)                 |
| 2C (Viral Protein)   | Proprietary                 | N/A (1:1,000)                    |
| H3.3K27M             | Cell Signaling Technologies | 74829 (WB 1:1,000) (IHC 1:1,600) |
| S6 Ribosomal Protein | Cell Signaling Technologies | 2217 (1:1,000)                   |
| GAPDH                | Cell Signaling Technologies | 5174 (1:1,000)                   |
| Flag                 | Cell Signaling Technologies | 2368 (1:1,000)                   |

*Flow cytometry antibodies*

| <b>Antibody</b>    | <b>Conjugate</b> | <b>Company</b>    | <b>Item Number</b> |
|--------------------|------------------|-------------------|--------------------|
| CD11c              | APC              | Biolegend         | 117310 (1:100)     |
| CD80               | BV605            | Biolegend         | 104729 (1:100)     |
| CD86               | Alexa Fluor 488  | Biolegend         | 105017 (1:100)     |
| CD40               | PE               | Biolegend         | 124609 (1:100)     |
| H2Kb               | BV711            | Biolegend         | 742862 (1:100)     |
| H2IAb              | BV421            | Biolegend         | 107631 (1:100)     |
| PDL1               | BUV395           | BD                | 745616 (1:100)     |
| 7AAD               | N/A              | Biolegend         | 420403 (1:100)     |
| CD45.2             | APC              | Biolegend         | 109814 (1:100)     |
| CD8                | BV421            | Biolegend         | 100738 (1:100)     |
| CD11b              | BV711            | Biolegend         | 101241 (1:100)     |
| CD19               | BV711            | Biolegend         | 115555 (1:100)     |
| CD4                | PE               | Biolegend         | 100512 (1:100)     |
| SIINFEKL Pentamer  | PE               | Pro-immune        | N/A (1:20)         |
| CD8 (KT15)         | FITC             | ThermoFisher      | MA5-16761 (1:100)  |
| TruStain FcX       | N/A              | Biolegend         | 101320 (1:50)      |
| Human TruStain FcX | N/A              | Biolegend         | 422301 (1:50)      |
| H3.3K27M Tetramer  | PE               | NIH Tetramer Core | N/A (1:20)         |
| Human CD11c        | APC-Cy7          | Biolegend         | 337218 (1:100)     |
| Human HLADR        | BV786            | Biolegend         | 307642 (1:100)     |
| Human CD40         | APC              | Biolegend         | 334310 (1:100)     |
| Human CD80         | BV421            | Biolegend         | 305222 (1:100)     |
| Human CD86         | BV510            | Biolegend         | 305432 (1:100)     |
| Human CCR7         | PE               | Biolegend         | 353204 (1:100)     |
| Human HLA ABC      | FITC             | Biolegend         | 311403 (1:100)     |
| Human PDL1         | BV605            | Biolegend         | 329724 (1:100)     |

## References

1. Campbell, S.A., Lin, J., Dobrikova, E.Y. & Gromeier, M. Genetic determinants of cell type-specific poliovirus propagation in HEK 293 cells. *J Virol* **79**, 6281-6290 (2005).
2. Gromeier, M. & Wimmer, E. Mechanism of injury-provoked poliomyelitis. *Journal of virology* **72**, 5056-5060 (1998).
3. Brown, M.C. *et al.* Cancer immunotherapy with recombinant poliovirus induces IFN-dominant activation of dendritic cells and tumor antigen-specific CTLs. *Sci Transl Med* **9** (2017).
4. Nair, S., Archer, G.E. & Tedder, T.F. Isolation and generation of human dendritic cells. *Curr Protoc Immunol* **Chapter 7**, Unit7 32 (2012).
