# Supplementary material for: Genetically stable poliovirus vectors activate dendritic cells and prime antitumor CD8 T cell immunity
Source: PubMed Central journal article supplement (PMC6985231; doi:10.1038/s41467-019-13939-z), 2020-01-27
Supplement: 41467_2019_13939_MOESM3_ESM.pdf [file 41467_2019_13939_MOESM3_ESM.pdf]

## Reporting Summary

Nature Research wishes to improve the reproducibility of the work that we publish. This form provides structure for consistency and transparency in reporting. For further information on Nature Research policies, see [Authors & Referees](#) and the [Editorial Policy Checklist](#).

### Statistics

For all statistical analyses, confirm that the following items are present in the figure legend, table legend, main text, or Methods section.

n/a Confirmed

- The exact sample size ( $n$ ) for each experimental group/condition, given as a discrete number and unit of measurement
- A statement on whether measurements were taken from distinct samples or whether the same sample was measured repeatedly
- The statistical test(s) used AND whether they are one- or two-sided  
*Only common tests should be described solely by name; describe more complex techniques in the Methods section.*
- A description of all covariates tested
- A description of any assumptions or corrections, such as tests of normality and adjustment for multiple comparisons
- A full description of the statistical parameters including central tendency (e.g. means) or other basic estimates (e.g. regression coefficient) AND variation (e.g. standard deviation) or associated estimates of uncertainty (e.g. confidence intervals)
- For null hypothesis testing, the test statistic (e.g.  $F$ ,  $t$ ,  $r$ ) with confidence intervals, effect sizes, degrees of freedom and  $P$  value noted  
*Give  $P$  values as exact values whenever suitable.*
- For Bayesian analysis, information on the choice of priors and Markov chain Monte Carlo settings
- For hierarchical and complex designs, identification of the appropriate level for tests and full reporting of outcomes
- Estimates of effect sizes (e.g. Cohen's  $d$ , Pearson's  $r$ ), indicating how they were calculated

*Our web collection on [statistics for biologists](#) contains articles on many of the points above.*

### Software and code

Policy information about [availability of computer code](#)

Data collection

GraphPad Prism 7, Microsoft Excel and BD FACSDIVA

Data analysis

GraphPad Prism 7, Microsoft Excel and FlowJo

For manuscripts utilizing custom algorithms or software that are central to the research but not yet described in published literature, software must be made available to editors/reviewers. We strongly encourage code deposition in a community repository (e.g. GitHub). See the Nature Research [guidelines for submitting code & software](#) for further information.

### Data

Policy information about [availability of data](#)

All manuscripts must include a [data availability statement](#). This statement should provide the following information, where applicable:

- Accession codes, unique identifiers, or web links for publicly available datasets
- A list of figures that have associated raw data
- A description of any restrictions on data availability

All data supporting our findings are provided within the Manuscript and Supplement.

### Field-specific reporting

Please select the one below that is the best fit for your research. If you are not sure, read the appropriate sections before making your selection.

- Life sciences       Behavioural & social sciences       Ecological, evolutionary & environmental sciences

## Life sciences study design

All studies must disclose on these points even when the disclosure is negative.

|                 |                                                                                                                                                                                                               |
|-----------------|---------------------------------------------------------------------------------------------------------------------------------------------------------------------------------------------------------------|
| Sample size     | No statistical method was used to determine sample size.                                                                                                                                                      |
| Data exclusions | No data were excluded from analyses                                                                                                                                                                           |
| Replication     | The number of times individual experiments were repeated is in the figure legend. A representative repeat was selected for publication and some replicates have been included in the supplementary materials. |
| Randomization   | All mouse experiments were randomized. An equal number of male and female were included in each group whenever possible.                                                                                      |
| Blinding        | Tumor volume measurements were blinded.                                                                                                                                                                       |

## Reporting for specific materials, systems and methods

We require information from authors about some types of materials, experimental systems and methods used in many studies. Here, indicate whether each material, system or method listed is relevant to your study. If you are not sure if a list item applies to your research, read the appropriate section before selecting a response.

### Materials & experimental systems

### Methods

|                                     |                                                                 |                                     |                                                    |
|-------------------------------------|-----------------------------------------------------------------|-------------------------------------|----------------------------------------------------|
| n/a                                 | Involved in the study                                           | n/a                                 | Involved in the study                              |
| <input type="checkbox"/>            | <input checked="" type="checkbox"/> Antibodies                  | <input checked="" type="checkbox"/> | <input type="checkbox"/> ChIP-seq                  |
| <input type="checkbox"/>            | <input checked="" type="checkbox"/> Eukaryotic cell lines       | <input type="checkbox"/>            | <input checked="" type="checkbox"/> Flow cytometry |
| <input checked="" type="checkbox"/> | <input type="checkbox"/> Palaeontology                          | <input checked="" type="checkbox"/> | <input type="checkbox"/> MRI-based neuroimaging    |
| <input type="checkbox"/>            | <input checked="" type="checkbox"/> Animals and other organisms |                                     |                                                    |
| <input checked="" type="checkbox"/> | <input type="checkbox"/> Human research participants            |                                     |                                                    |
| <input checked="" type="checkbox"/> | <input type="checkbox"/> Clinical data                          |                                     |                                                    |

## Antibodies

|                 |                                                                                        |
|-----------------|----------------------------------------------------------------------------------------|
| Antibodies used | All antibodies used, catalog number and company are listed in supplementary materials. |
| Validation      | All antibodies used have been validated by the company selling them.                   |

## Eukaryotic cell lines

Policy information about [cell lines](#)

|                                                                      |                                                                                                                                                                                                                                                                                  |
|----------------------------------------------------------------------|----------------------------------------------------------------------------------------------------------------------------------------------------------------------------------------------------------------------------------------------------------------------------------|
| Cell line source(s)                                                  | HeLa R19 (Dr. E. Wimmer, State Univ. of NY at Stony Brook)<br>Jurkat 76 expressing H3.3K27M TCR and CD8 (Dr. H. Okada, UCSF, co-author)<br>CT2A (Dr. P. Fecci, Duke Univ.)<br>B16F10.9 (ATCC)<br>B16F10.9-OVA (Dr. S. Nair, Duke Univ.)<br>DIPG36 (Dr. M. Monje, Stanford Univ.) |
| Authentication                                                       | J76CD8+TCR+ cells were validated by flow cytometry.                                                                                                                                                                                                                              |
| Mycoplasma contamination                                             | Cells were routinely tested for mycoplasma contamination.                                                                                                                                                                                                                        |
| Commonly misidentified lines<br>(See <a href="#">ICLAC</a> register) | None                                                                                                                                                                                                                                                                             |

## Animals and other organisms

Policy information about [studies involving animals](#); [ARRIVE guidelines](#) recommended for reporting animal research

|                    |                                                                                                                                                                                                                                                                                                                                                                |
|--------------------|----------------------------------------------------------------------------------------------------------------------------------------------------------------------------------------------------------------------------------------------------------------------------------------------------------------------------------------------------------------|
| Laboratory animals | C57Bl6 mice transgenic for human CD155 (hCD155-tg mice) are maintained as a breeding colony (9); they were originally obtained from S. Koike (44).<br>OT-I mice were obtained from Jackson laboratories #003831<br>AAD Mice were obtained from Jackson laboratories #004191<br>AAD/hCD155 mice were obtained by breeding AAD mice with hCD155-transgenic mice. |
|--------------------|----------------------------------------------------------------------------------------------------------------------------------------------------------------------------------------------------------------------------------------------------------------------------------------------------------------------------------------------------------------|

Wild animals

No wild animals involved.

Field-collected samples

No field samples collection involved.

Ethics oversight

All mouse experiments were performed under Duke University IACUC-approved protocols.

Note that full information on the approval of the study protocol must also be provided in the manuscript.

## Flow Cytometry

### Plots

Confirm that:

- The axis labels state the marker and fluorochrome used (e.g. CD4-FITC).
- The axis scales are clearly visible. Include numbers along axes only for bottom left plot of group (a 'group' is an analysis of identical markers).
- All plots are contour plots with outliers or pseudocolor plots.
- A numerical value for number of cells or percentage (with statistics) is provided.

### Methodology

Sample preparation

Cells were washed with FACS buffer (1XPBS + 2%FBS) and resuspended in 100 uL. Cells were Fc-blocked (TruStain, Biolegend), stained (1h) with the appropriate antibodies (Supplementary Table S2), washed and resuspended in 250uL FACS buffer to be analyzed on a BD LSRFortessaX20. Compensation and data analysis done using FlowJo.

Instrument

BD FortessaX20 (Duke Cancer Institute Flow Cytometry Core)

Software

BD FACSDiVa was used to acquire data.  
Compensation and data analysis was performed on FlowJo (Treestar).

Cell population abundance

At least  $10^5$  cells were analyzed per sample in all studies.

Gating strategy

All gating strategies are shown in supplementary figures. Usual gating steps: 1. Gate out debris on FSC and SSC plot. 2. Gate on single cells (FSC-A/FSC-H). 3. Gate out dead cells. 4. Gate on population of interest as using a negative sample (e.g. untreated BMDCs or human DCs), positive sample (e.g. BMDCs treated with LPS or human DCs treated with maturation cytokine cocktail). Isotype controls were used whenever relevant.

- Tick this box to confirm that a figure exemplifying the gating strategy is provided in the Supplementary Information.
